# Supplementary material for: Toward a cognitive science of markets: economic agents as sense-makers
Source: publisher site journal article supplement (doi:10.5018/economics-ejournal.ja.2019-49), 2019-12-01
Supplement: Supplementary file 1 [file journalarticles_2019-49-sm2.pdf]

**Ekkehart Schlicht - Social psychology may be of relevance, too**

March 17, 2019 - 09:56

This is a very stimulating contribution offering a treasure-trove of references.

Let me add some comments from my (slightly different) point of view.

I would think that social psychology is as relevant as cognitive science for the problems discussed in the paper. The analysis of “causal forks” ...[more]

... and “causal chains” is a central topic in classical attribution theory (Heider, Kelley), which is usually considered part of social psychology. The classical reference would be the book “Social Psychology” by Solomon Asch. Asch points out that cognition and emotion are closely connected. This connection is sometimes lost when focusing mainly on cognition.

You seem not to address the orthodox position of economists regarding the use of heuristics etc., but maybe a paragraph on this topic may be useful. Alfred Marshall, Armen Alchian and evolutionary economists have taken that position. Here it is assumed that people follow routines and heuristics, but they change them: They copy successful routines, drop unsuccessful ones, and vary behavior. So there is variation and selection, and in the end successful behaviors survive. The Friedman-Savage example of the expert billiard player who cannot apply the laws of physics to the movements of the billiard balls but plays nevertheless as if could do so, epitomizes this.

I think that this is, theoretically speaking, a very strong argument for side-stepping behavioral considerations in many economic settings, yet I think that it is misleading because there are many examples where we observe behaviors that contradict with that stance. In order to understand the persistence of suboptimal, and even costly, routines, I have urged in my book “On Custom in the Economy” that social psychology (including cognitive elements) have to be brought into economics, very much in the Asch tradition (where sense-making is central, by the way). I attach the preface to the 2018 paperback edition.

**Magda Osman, Queen Mary University of London, UK - Referee report 1**

May 20, 2019 - 12:57

see attached file

**Richard Bronk, London School of Economics and Political Science, UK - Referee report 2**

May 21, 2019 - 09:46

see attached file

**Samuel G.B. Johnson - Response to comment and reports**

November 22, 2019 - 14:03

see attached file
